# Supplementary material
Source: publisher site journal article supplement (https://www.dovepress.com/article/316166)
Supplement: Supplementary file 1 [file get_supplementary_file.php]

**Supplementary Materials**

Contents

[Table S1. Summary of legislative requirements for private and day hospitals to provide patient admitted data 2](#_Toc76547648)

[Table S2. Search strategy parameters 3](#_Toc76547649)

[Table S3. Brief descriptions of key databases and sources searched 5](#_Toc76547650)

[Table S4. Sample search phrases used in LexisNexis 6](#_Toc76547651)

[Table S5. Data extraction for case law review 7](#_Toc76547652)

[Table S6. Summary of findings table (detailed) 8](#_Toc76547653)

[Table S7. Pathway to discovery, antecedents, long term impacts 15](#_Toc76547654)

[References 19](#_Toc76547655)

# Table S1. Summary of legislative requirements for private and day hospitals to provide patient admitted data

Table data organised by State and Territory jurisdiction.1

| Jurisdiction | Facilities licensed | Stated reporting requirement[[1]](#footnote-1) | Data provided to DHA[[2]](#footnote-2) |
| --- | --- | --- | --- |
| New South Wales (NSW) | • Private Hospitals • Day facilities In addition, there are eighteen prescribed classes of private health facilities | Required under legislation  • Adverse Events • Root Cause Analysis • Regular audit • Admitted Patient Collection | No |
| Victoria (VIC) | • Private Hospitals • Day facilities | Required under legislation  • Self-audit tool • Episode level data • Admitted Patient Collection | No |
| Queensland (QLD) | • Private Hospitals • Day facilities | Required under legislation  • **Sentinel events**, including retained surgical items • Root Cause Analysis • Adverse outcome data on six monthly basis • Self-audit tool • Admitted Patient Collection | Informally |
| South Australia (SA) | • Private Hospitals, excluding day facilities | Provided voluntarily  • Provision of documents for inspections | No |
| Western Australia (WA) | • Private Hospitals • Day facilities, A-D • Private nursing posts • Private Psychiatric Nursing Hostels • Private Nursing homes | Required under legislation  • **Sentinel events**, including retained surgical items • Root Cause Analysis • Mortality Review • Inpatient statistics | Informally |
| Tasmania (TAS) | • Private hospitals • Day hospitals | Provided voluntarily  • Nil | No |
| Northern Territory (NT) | • Private hospitals, including day hospitals | Provided voluntarily  • Unknown | No |
| Australian Capital Territory (ACT) | • Healthcare facilities, including public, private and day hospitals | Provided voluntarily  • Notifiable incidents  • Annual report |  |

**Legend:** DHA = Commonwealth Department of Health and Ageing, Australia

# Table S2. Search strategy parameters

**General Parameters:** date of publication limited to 1986 – 2018; searches limited to Australian case law; language restricted to English.

| **Databases** | **Other sources** | **Search terms** |
| --- | --- | --- |
| Part 1   1. Coroner Court websites in all jurisdictions:    1. QLD - <http://www.courts.qld.gov.au/courts/coroners-court/findings>    2. NSW- <http://www.coroners.justice.nsw.gov.au/Pages/findings.aspx>    3. VIC - <http://www.coronerscourt.vic.gov.au/home/coroners+written+findings/>    4. WA - <http://www.coronerscourt.wa.gov.au/>    5. SA - <http://www.courts.sa.gov.au/CoronersFindings/Pages/All-Findings.aspx>    6. TAS - <http://www.magistratescourt.tas.gov.au/about_us/coroners/coronial_findings>    7. NT - <https://justice.nt.gov.au/courts/coroners-decisions>    8. ACT - <http://www.courts.act.gov.au/magistrates/courts2/coroners_court/selected-findings> 2. Health Practitioner Tribunal websites in all jurisdictions:    1. NSW Civil and Administrative Tribunal - [www.ncat.gov.au](http://www.ncat.gov.au/)    2. ACT Civil and Administrative Tribunal - [www.acat.act.gov.au](http://www.acat.act.gov.au/)    3. NT Civil and Administrative Tribunal - [www.ntcat.nt.gov.au](http://www.ntcat.nt.gov.au/)    4. QLD Civil and Administrative Tribunal - [www.qcat.qld.gov.au](http://www.qcat.qld.gov.au/)    5. SA Health Practitioners Tribunal - [www.healthpractitionerstribunal.sa.gov.au](http://www.healthpractitionerstribunal.sa.gov.au/)    6. TAS Health Practitioners Tribunal - [www.healthpractitionerstribunal.tas.gov.au](http://www.healthpractitionerstribunal.tas.gov.au/)    7. VIC Civil and Administrative Tribunal - [www.vcat.gov.au](http://www.vcat.gov.au/)    8. WA State Administrative Tribunal - [www.sat.justice.wa.gov.au](http://www.sat.justice.wa.gov.au/) 3. Australian Health Practitioner Regulation Agency (AHPRA) and National Boards Panel Hearings - <https://www.ahpra.gov.au/>   Part 2 Databases   1. LexisNexis 2. AustlII 3. CCH IntelliConnect 4. Westlaw (AU) 5. Google Scholar | 1. AIHW notifications contained in the [AIHW Private and Public Sector Medical Indemnity Claims Report in Australia](file:///C:\Users\osbor\Dropbox\Retained%20Surgical%20Instruments%20Project\CURRENT\AIHW%20Private%20and%20Public%20Sector%20Medical%20Indemnity%20Claims%20Report%20in%20Australia) (initially only the last 5 reports were checked) 2. [NSW Clinical Excellence Commission](https://www.cec.health.nsw.gov.au/) and other state bodies 3. [National Health Practitioner Ombudsman and Privacy Commissioner](https://www.nhpo.gov.au/about-us) 4. [Factiva](https://professional.dowjones.com/factiva/) for news articles on incidents 5. Insurance claims and other data held by medical insurers 6. Medical Incident Management Reports (IMMS in NSW, and similar reporting agencies in other Australian jurisdictions) 7. Relevant policies and guidelines for anecdotal evidence (e.g. see the [Australian Commission for Safety and Quality in Healthcare](https://www.safetyandquality.gov.au/)) | Five categories of search terms are detailed below with draft terms.  Terms within and across these categories were searched solely or in combination using Boolean logic; with different terms used as appropriate for research questions.  Truncators and proximity operators were used as required.  Underlined terms indicate starting point to generate initial broad sample.  **Doctor**  Surgeon  Doctor  Physician  Health practitioner  Nurse  Nursing staff  Theatre staff  Hospital  Medical practitioner  Healthcare professional  Health institution  **Medical negligence**  Medical negligence  Clinical negligence  Medical malpractice  Negligence  Duty of care  Adverse event  Medical error  Res ipsa loquitur  **Retained Surgical Instrument**  RSI  Retained instrument  Surgical sponge  Sponge  Retained foreign object  Retained foreign bod*  Surgical mesh  Mesh  Suture*  Metal clamp  Pad  Non-Mickulicz laparotomy pad  Gossypiboma  Postoperative foreign bod*  Textiloma  Cottonoid  Cottonballoma  Muslinomas  Gauzeoma  Towel  Rubber tube  Reactive tissue  Swab  **Adverse Outcome**  Death  Post-operative infection  Sepsis  Complication*  Sentinel event  **Retain**  Retained  Retention  Miscount  Failure to count  Sponge count  Incorrect count  Stuck together  Poor tracking system |

# Table S3. Brief descriptions of key databases and sources searched

| **Search Source** | **Brief Description** |
| --- | --- |
| [AHPRA](https://www.ahpra.gov.au/) | The Australian Health Practitioner Regulation Agency (AHPRA) is the organisation responsible for the implementation of the National Registration and Accreditation Scheme for health professions across Australia. AHPRA works with 15 National Health Practitioner Boards whose primary role is to protect the public. The Boards relevant to this study include the *Nursing and Midwifery Board of Australia* and the *Medical Board of Australia*. |
| [AustLII](http://www.austlii.edu.au/) | The Australasian Legal Information Institute (AustLII) is a joint facility of the University of Technology Sydney (UTS) and the University of New South Wales (UNSW) Faculties of Law and is Australia's most popular online free-access resource for Australasian legal information, with over 700,000 hits daily. |
| [LexisNexis](https://www.lexisnexis.com.au/en/about-us/about-lexisnexis) | LexisNexis is a corporation providing computer-assisted legal research (CALR) that pioneered the electronic accessibility of legal and journalistic documents. The company has the world's largest electronic database for legal and public-records related information. |
| [CCH IntelliConnect (Legal)](https://www.wolterskluwer.com/en-au/solutions/cch-intelliconnect-apac) | CCH IntelliConnect offers streamlined legal and regulatory research, analysis, and workflows for legal professionals, law firms, General Counsel offices and corporate legal departments to assist with transparent, data-driven decision-making. |
| [Westlaw (AU)](https://legal.thomsonreuters.com.au/products/westlaw/) | Westlaw maintains a comprehensive library of resources in Australia to expedite searching by combining industry-leading legal expertise and the latest in smart technology. |

# Table S4. Sample search phrases used in LexisNexis

| **Search Strings** |
| --- |
| 1. ("left in" OR retain OR retained OR "leave in" OR "forgot to remove") AND (inadvertent OR error OR miscount) AND (surgery OR surgeon) AND cavity |
| 1. "failure to remove" AND surgery |
| 1. "foreign body" and surgery |
| 1. "foreign object" OR "foreign body" AND remove AND surgery OR operat* |
| 1. "left in" OR retain OR retained OR "leave in" OR "forgot to remove" AND perioperative |
| 1. "medical negligence" AND surgery AND retained |
| 1. "res ipsa loquitur" AND surgery AND "medical negligence" |
| 1. remove AND surgery AND error OR mistake OR accident AND "foreign body" OR "foreign object*" OR fragment OR instrument OR tool OR device OR sponge OR screw OR swab OR pin OR clip OR clamp OR tweezer OR "electrosurgical adapter" OR forceps OR scissor OR tip OR tube OR tubing OR "ultrasound tissue disruptor" OR bulb OR "laser guide" OR "guide wire" OR "guide-wire" |
| 1. surgery OR surgical OR operat* AND retain* OR unretriev* OR forgot |

# Table S5. Data extraction for case law review

| **A standardised template (coding framework) was developed to guide data extraction of key features and findings of the cases for consideration in the analytical phase of the study, and in particular, features identified in the literature as being associated with retained surgical item events. Key features and findings extracted included:** |
| --- |
| - General case note: facts, issues, and decision |
| - Characteristics of patient (age, sex, location –rural/regional/urban, ethnicity, indigenous, non-English speaking, obesity status) |
| - Characteristics of hospital – public/private |
| - Characteristics of personnel - Junior/Senior, Nurse/Surgeon |
| - Characteristics of Operation – type, location of operation, date |
| - Item retained (for example, sponge, raytex gauze swab, instrument, consumable item) |
| - Reason given for retention of item (for example, risk factors, such as change in nursing personnel during surgery, excessive loss of blood, lack of a complete count of sponges and other surgical items, fatigue in the surgery team due to the lengthiness or lateness of the operation, urgency of the surgery, obesity of the patient, unexpected intraoperative developments, the involvement of multiple surgery teams, performance of more than one major procedure simultaneously) |
| - Where retained item was left in patient (for example, abdomen/pelvis, thorax, vagina, spinal cord, face, brain, extremity) |
| - When/How retained item was detected, for example, number of days after the operation (range: day of surgery >six years) |
| - Was there disclosure of the adverse event to patient? When? By whom? |
| - Patient outcome (for example, death, readmission to hospital, prolonged hospital stay, sepsis/infection, fistula or small bowel obstruction, visceral perforation) |
| - Type of hearing (for example, civil/disciplinary/coronial) |
| - Category of legal action (for example, negligence, , nervous shock, breach of contract, employment law) |
| - Nature of hearing (for example, procedural, first instance decision/trial, appeal) |
| - Nature of defendant (nurse/doctor/hospital) |
| - Nature of plaintiff (patient/relatives seeking compensation) |
| - Legal outcome, decision, and rationale for decision |
| - Amount of compensation paid and defence costs |
| - Types of harm for which compensation was awarded (loss of income, cost of care, future medical costs, psychosocial damage) |

# Table S6. Summary of findings table (detailed)

| Case Citation [Date] | Type of Case | Date of Retention  (Date of surgery) | Date of Discoverability  (of retained item) | Type of Surgery (original) | Item (s) Retained | Pathway to Discovery | Antecedents | Factors and Judges’ Ruling | Long term Impacts/ Consequences |
| --- | --- | --- | --- | --- | --- | --- | --- | --- | --- |
| Elliot v Bickerstaff [1999] NSWCA 453 2 | Civil appeal from a trial verdict | 13 Jun 1991 | *Exact detail on date of discovery missing from record]*; however, noted from record - “it was necessary for the respondent to undergo further surgery for removal of the sponge about six weeks later”. | Total hysterectomy and colpo-suspension | Surgical sponge  *[Author Note: FINAL COUNT CORRECT -COMMUNICATED AND RECORDED]* | All sponges and swabs accounted for [count correct] at the end of surgery on 13 June 1991. “Physical problems afflicting the respondent led to discovery of the sponge…” | Trial judge inferred that “there was a **miscount** or error by the theatre sister [i.e. operating room nurse] or a nurse subservient to her which resulted in unfounded assurances being given to the surgeon”. | The patient could not rely upon the maxim res ipsa loquitur. The **appellant surgeon should not have been found liable** as he did not breach  his duty of care to his patient. | Item unintentionally retained for 6 weeks.  Patient was left with a “disfiguring scar from second operation and ongoing physical and psychiatric problems” |
| *Gaynor v Milton [&] Ulladulla Hospital* [and two honorary staff doctors] (Unreported, Supreme Court of New South Wales Court of Appeal, Hope JA, Glass JA and Mahoney JA, 5 November 1981) 3 | Civil appeal (procedural) – Appeal against the case being taken from the jury | 10 Jun 1975 | *Exact detail missing from record;* however, record indicates operating room staff knew that missing piece of forceps was there before the operation was concluded. | Appendicectomy | Piece of forceps (about ½ inch) broken off in course of operation and left behind “for reasons not explained”. | Operating room staff were aware the forceps had broken and decided to close the patient, check the x-ray, and remove the retained piece later [rationale not provided in record] | Exact detail missing from record.  *[Author Note: exact detail missing from record on date, if any, of subsequent operation to remove retained item.]* | **Appeal against** **first defendant (the hospital) dismissed.** There must be a **new trial against the 2nd and 3rd defendants** (the surgeons); the plaintiff (patient) was entitled to have the case submitted to the jury.  “The doctrine [of res ipsa loquitur] will not be in applicable. | *[Author Note: Exact detail missing from record to estimate how long item unintentionally retained.]*  *[Author Note: Detail missing from record on long term impacts and consequences.]* |
| *Hughes v Minister for Health in his capacity as Board of East Pilbara Health Service* (Unreported, Supreme Court of Western Australia, Malcolm CJ, Pidgeon and Steytler JJ, 16 April 1999, 20 April 1999) 4 | Civil action (procedural) – Appeal against dismissal of application for permission to commence an action outside of limitation period | 20 Dec 1994 - stitches holding drainage tubes in place were removed  *[Author note: patient re-admitted to hospital on 2 Dec ’94 and discharged on 4 Dec ’94. Patient re-admitted to hospital on 15 Dec ’94 and discharged on 22 Dec ’94.*  *Exact detail missing from record on actual date of surgery to insert drainage tubes]* | 212/2 Dec 1994-  missing left draining tube discovered. Patient discharged 22 Dec ‘94.  19 Jan 1995 - missing left drainage tube confirmed retained in patient via scans  Time to confirmed discovery 28 days;  *[Author note: actually ‘missing’ for about 35 days]* | 1.Insertion of two drainage tubes to drain fluid build-up  *[Author note: date unclear].*  2.Removal of stitches holding tubes in place (20 Dec ’94).  3.Removal of right drainage tube (22 Dec ’94)  4. removal of retained left drainage tube 6 Feb 1995 –  *[Author note: removal approx. 2 more weeks after discovery to removal* | Left drainage tube  *[Author note: when stitches removed, tubes were left protruding by 20 mm and covered with two dressings]* | Patient suffered severe central abdominal pain, nausea, vomiting, constipation and fatigue and was unable to work and was referred. He underwent x-rays and an ultrasound scan which showed the missing drainage tube. | No additional details in record.  *[Author note: patient had four operations in Sep ‘93, Jan ‘94, May ’94 and Nov ‘94 for repair of recurrent umbilical hernia prior to surgery to insert drainage tubes for wound seroma developed in previous surgery]* | “…not a case for application of…res ipsa loquitor”  **Appeal allowed –** patient granted permission (leave) to commence an action in terms of a proposed amended statement of claim.  There was discussion about the contribution of the retained item to the patient’s symptoms with the judge stating, “[t]he exclusion of the drain as the "prime cause for the excessive symptoms [the patient] now has" leaves the inference open that it was a cause. | Item unintentionally retained for approx. 46 days.  Continued to suffer from abdominal pain, fatigue and loss of enjoyment of life. Also claimed damages for loss of his earning capacity as a sign writer and painter and for medical and traveling expenses.  *[Author note: patient underwent subsequent surgery on 6 Feb 1995 at Bentley Hospital to have missing tube removed].* |
| *Ives v Australian Capital Territory and Anor* BC9506456 (Unreported, Supreme Court of the Australian Capital Territory, Higgins J, 20 October 1995, 8 December 1995) 5  The Australian Capital Territory v Ives (Unreported, Federal Court of Australia, Gallop, Wilcox and Finn JJ, 16 April 1996, 26 July 1996). 6 | Civil action (procedural) – permission to commence action outside of limitation period | On or around 12 Mar 1974 | 11 Oct 1994  Time to discovery approx. 20 years, 5 months | Securing, resecuring or removing a Redivac™ draining tube in connection with a hysterectomy | Straight surgical suture needle  *[Author Note: COUNT CORRECT IMPLIED]* | Patient underwent a chest and spinal x-ray for an unrelated matter which revealed the presence of a metallic object in her heart | Labelled an emergency; however, surgery was performed the day after admission so surgeon considered that it would not have been a 'rushed' operation | Extension of time for filing claim allowed in part  *[Author Note: a later application by the defendants for permission to appeal to the Full Court against this judgement approving extension to file was dismissed]* | Medical opinion was that the needle should be left undisturbed but scanned annually. Since learning of the needle in her heart, the patient has become depressed and anxious. |
| *Kenjar v ACT* BC201402661 (Unreported, Supreme Court of the Australian Capital Territory, Master Mossop J, 17 April 2014) 7 | Civil action (procedural) – application to amend claim | 26 Aug 2008 (k-wire insertion)  16 Sep 2008 (k-wire removal) | 2 Oct 2008  Note: x-ray taken on date of surgery found to show k-wire fragment present | Open reduction and multiple k-wire fixation of his right hand  *[Author Note: subsequent surgery to remove k-wires on 16 September 2008]* | Piece of k-wire | Plaintiff was reviewed on 23 September. Presented at the hospital on 30 Sept 2008 with pain and swelling, necrotic skin and abscess in his right hand. Procedure undertaken to excise necrotic tissue and wash the abscess. | Exact detail missing from record. | **Application dismissed** as amendment was not supported by expert evidence | Pain and swelling; subsequent procedure to remove necrotic skin and wash abscess that had formed. Claimed to have contracted a staphylococcus aureus infection and suffered permanent injury to his right hand |
| Langley v Glandore Pty Ltd (in liq) [1997] QCA 342 8 | Civil appeal from negligence verdict against surgeons | 22 Feb 1990 | Exact detail missing from record; however, time to discovery described as “some ten months later” | Total abdominal hysterectomy | Sponge  *[Author Note: CORRECT COUNT RECORDED. NURSE ADMITTED TO A COUNTING ERROR AT TRIAL.]* | Painful symptoms manifested themselves, leading to another operation performed some ten months later | None of the witnesses had a recollection of anything untoward occurring in the course of the operation | Judge indicated incorrect count performed by nurses.  **Appeal upheld** – surgeons to recover from hospital in respect of damages owing to plaintiff. | Painful symptoms  From law text book – “After the operation it became apparent, as a result of certain symptoms suffered by the woman, that a surgical sponge had been left inside her abdomen. The painful symptoms manifesting this fact were such that she was required to undergo a further operation some 10 months after the first operation to have that sponge removed.” |
| *Miller v Broadbent* BC9905589 (Unreported, Supreme Court of Queensland, Muir J, 6 August 1999, 12 August 1999) 9 | Civil action (procedural) – permission to commence action outside of limitation period | Oct 1992 | 5 June 1996 | Laparoscopy stomach banding operation | Silicon tubing | Exploratory surgery in abdominal cavity due to ongoing abdominal pain. “On 5 June 1996 a piece of silicon tubing was discovered in and removed from the applicant's abdominal cavity in the course of exploratory surgery.” | Exact detail missing from record. | Judge **agreed to hear** submissions | Abdominal pain; underwent various investigative procedures which failed to reveal source of pain |
| *O'Hagan v Sakker* BC201140099 (Unreported, New South Wales District Court, Levy SC DCJ, 24 February, 15 April, 13, 27 May, 11 July 2011) 10 | Civil action (procedural) – permission to commence action outside of limitation period | 10 Aug 1992 | 2 Oct 2007  *[Author Note: x-ray in 2003 – later examination of that film (in 2010) revealed presence of pack in abdomen; patient not informed in 2003; fall in 2007 and subsequent x-ray for abdominal pain revealed intra-abdominal foreign body]* | Hemi-colectomy/ sigmoid colectomy | Surgical pack  *[Author note: CORRECT COUNT IMPLIED]*  [Author Note: pack removed 02/10/2007; although link to specific previous surgery not confirmed with patient until Sept 2010] | Patient suffered a fall and several days later was admitted to hospital suffering from abdominal pain, resulting in an abdominal x-ray which revealed the presence of the retained surgical item | Exact detail missing from record. | Retained surgical pack had been overlooked and left behind following the procedure. **Extension of time for filing claim allowed**.  “…case based on res ipsa loquitur …unatenable” | Abdominal pain/cramping, fevers and loss of bowel control; psychosocial problems stemming from the retention of the pack, for which patient obtained psychiatric treatment; subsequent to pack removal patient preoccupied with deleterious effects on here health from retained pack and sought psychiatric treatment. |
| *Smith v Marcus BC8902456 (Unreported, Supreme Court of New South Wales, Studdert J, 6 March 1989* 11 | Civil action (procedural) – permission to commence action outside of limitation period | 24 Nov 1977 | 24 November 1987 | Hysterectomy and insertion of drainage tube | Redivac™ drainage tube  “measuring 125mm in length’  *[Author Note: Detail on date of original drain removal procedure missing from record.]*  "On the 24th November, 1987, [a surgeon] explored her lower abdominal tranverse wound and removed the Redivac™ drain, measuring 125mm in length” | Patient suffered persistent pain and discomfort in the pelvic area. She underwent a series of tests over a number of years including a bowel x-ray, blood tests, medical examinations, an abdominal ultrasound. Retained surgical item was discovered by her doctor’s further examination of IVP plates (not mentioned in the radiologists’ report) | Exact detail missing from record.  The plaintiff gave evidence of “her recollection of a comment made by the first defendant [surgeon] when the tube was being removed to the effect that he "thought the tube was longer than that."  Patient returned to surgeon for follow up; internal exam performed; patient informed that “nothing was wrong”. | Extension of time for filing claim allowed | Pain and discomfort in the stomach and pelvic area exacerbated by walking over a period of ten years with multiple visits to many different health professionals. Advised to ‘eat bran’ and ‘no fat diet’ |
| Record of Investigation into Death (Without Inquest) of James Stirling McKinlay - (Tasmanian Coroners Court 2013, Record of Investigation into Death (without inquest) of James Stirling McKinlay, 2013 TASCD 14212 | Coronial investigation | 02 Jun 2012  “Then operating room nurse’s report records that six small packs and one large pack were left in situ. It also records that 40 packs were used and the final count of packs removed is 33.”  Patient transferred to Royal Hobart Hospital later that day. | 14 June 2012 | Follow up surgery to address internal bleeding following a pancreatico- duodenectomy (Whipples procedure) | Surgical pack  *[Author Note: all intentionally retained surgical packs were not removed in subsequent surgery-one left behind]* | Additional surgeries undertaken (04/06, 11/06). During the surgery at Royal Hobart Hospital on 4 June 2012 six packs were removed. A plain x-ray taken on 6 June 2012 shows the retained pack but it was not reported by the radiologist reading the film or seen by the managing doctors. A CT scan of the abdomen on 7 June again shows the retained pack which was not noted. Between then and 14 June 2012 Mr Turner became aware of the possible retention of one surgical pack in Mr McKinlay’s abdomen. During another surgical procedure on 14 June 2012 a tightly compressed pack was discovered away from the site of the other packs and was removed. | Transferred between hospitals with an incomplete medical record and a lack of clear communication of the number of packs left in situ on the handover.  “Although the LGH nursing records of retained packs were correct, the medical record was incomplete. Mr McKinley was transferred to the RHH with a relatively brief accompanying letter. I have no doubt that there was considerable discussion through numerous phone calls but examination of the medical records reveals no clear formal communication of the number of packs left in situ on the handover.  Patient ‘wa s extremely ill and being treated in circumstances of emergency. | “it is easy to appreciate how the retained pack might have been missed both on the handover and the X-ray in this case. He was extremely ill and being treated in circumstances of emergency.”  Death occurred as a result of a fungal infection following major abdominal surgery for cancer. No other contribution to his death | Retained pack did not contribute to death.  Both hospitals were recommended to review their procedures with regards to retained packs |

# Table S7. Pathway to discovery, antecedents, long term impacts

| Case Citation [Date, State] | Pathway to discovery | Antecedents | Factors and judges’ ruling | Long term impacts/ consequences of living with a retained surgical item (human costs) |
| --- | --- | --- | --- | --- |
| Elliott v Bickerstaff  [1999, ACT] 2 | All sponges and swabs accounted for [count correct] at the end of surgery on 13 June 1991. “Physical problems afflicting the respondent led to discovery of the sponge…” | Trial judge inferred that “there was a **miscount** or error by the theatre sister [i.e. operating room nurse] or a nurse subservient to her which resulted in unfounded assurances being given to the surgeon”. | The patient could not rely upon the maxim res ipsa loquitur. The **appellant surgeon should not have been found liable** as he did not breach  his duty of care to his patient. | Item unintentionally retained for 6 weeks.  Patient was left with a “disfiguring scar from second operation and ongoing physical and psychiatric problems” |
| *Gaynor v Milton [&] Ulladulla Hospital* [1981, NSW] 3 | Operating room staff were aware the forceps had broken and decided to close the patient, check the x-ray, and remove the retained piece later *[Author note: rationale not provided in record]* | Exact detail missing from record.  *[Author note: exact detail missing from record on date, if any, of subsequent operation to remove retained item.]* | **Appeal against** **first defendant (the hospital) dismissed.** There must be a **new trial against the 2nd and 3rd defendants** (the surgeons); the plaintiff (patient) was entitled to have the case submitted to the jury.  “The doctrine [of res ipsa loquitur] will not be in applicable. | Exact detail missing from record to estimate how long item unintentionally retained.  Detail missing from record on long term impacts and consequences. |
| *Hughes v Minister for Health East Pilbara Health Service* [1999, WA] 4 | Patient suffered severe central abdominal pain, nausea, vomiting, constipation and fatigue and was unable to work and was referred. He underwent x-rays and an ultrasound scan which showed the missing drainage tube. | No additional details in record.  *[Author note: patient had four operations in Sep ‘93, Jan ‘94, May ’94 and Nov ‘94 for repair of recurrent umbilical hernia prior to surgery to insert drainage tubes for wound seroma developed in previous surgery]* | “…not a case for application of…res ipsa loquitor”  **Appeal allowed –** patient granted permission (leave) to commence an action in terms of a proposed amended statement of claim.  There was discussion about the contribution of the retained item to the patient’s symptoms with the judge stating, “[t]he exclusion of the drain as the "prime cause for the excessive symptoms [the patient] now has" leaves the inference open that it was a cause. | Item unintentionally retained for approximately. 46 days.  Patient continued to suffer from abdominal pain, fatigue and loss of enjoyment of life. Also claimed damages for loss of his earning capacity as a sign writer and painter and for medical and traveling expenses.  *[Author note: patient underwent subsequent surgery on 6 Feb 1995 at Bentley Hospital to have missing tube removed].* |
| *Ives v Australian Capital Territory and Anor*  [1995, ACT] 5  *The Australian Capital Territory v Ives [1996, ACT] 6* | Patient underwent a chest and spinal x-ray for an unrelated matter which revealed the presence of a metallic object in her heart | Labelled an emergency; however, surgery was performed the day after admission so surgeon considered that it would not have been a 'rushed' operation | Extension of time for filing claim allowed in part  *[Author Note: a later application by the defendants for permission to appeal to the Full Court against this judgement approving extension to file was dismissed]* | Medical opinion was that the needle should be left undisturbed but scanned annually. Since learning of the needle in her heart, the patient has become depressed and anxious. |
| *Kenjar v ACT*  [2014, ACT] 7 | Plaintiff was reviewed on 23 September. Presented at the hospital on 30 Sept 2008 with pain and swelling, necrotic skin and abscess in his right hand. Procedure undertaken to excise necrotic tissue and wash the abscess. | Exact detail missing from record. | **Application dismissed** as amendment was not supported by expert evidence | Pain and swelling; subsequent procedure to remove necrotic skin and wash abscess that had formed. Claimed to have contracted a staphylococcus aureus infection and suffered permanent injury to his right hand |
| Langley v Glandore Pty Ltd  [1997, QLD] 8 | Painful symptoms manifested themselves, leading to another operation performed some ten months later | None of the witnesses had a recollection of anything untoward occurring in the course of the operation | Judge indicated incorrect count performed by nurses.  **Appeal upheld** – surgeons to recover from hospital in respect of damages owing to plaintiff. | Painful symptoms  From law text book description of case – “After the operation it became apparent, as a result of certain symptoms suffered by the woman, that a surgical sponge had been left inside her abdomen. The painful symptoms manifesting this fact were such that she was required to undergo a further operation some 10 months after the first operation to have that sponge removed.” |
| *Miller v Broadbent* [1999, QLD] 9 | Exploratory surgery in abdominal cavity due to ongoing abdominal pain; “On 5 June 1996 a piece of silicon tubing was discovered in and removed from the applicant's abdominal cavity in the course of exploratory surgery.” | Exact detail missing from record. | Judge **agreed to hear** submissions | Abdominal pain; underwent various investigative procedures which failed to reveal source of pain |
| *O'Hagan v Sakker*  [2011, NSW] 10 | Patient suffered a fall and several days later was admitted to hospital suffering from abdominal pain, resulting in an abdominal x-ray which revealed the presence of the retained surgical item | Exact detail missing from record. | Retained surgical pack had been overlooked and left behind following the procedure. **Extension of time for filing claim allowed**.  “…case based on res ipsa loquitur …unatenable” | Abdominal pain/cramping, fevers and loss of bowel control; psychosocial problems stemming from the retention of the pack, for which patient obtained psychiatric treatment; subsequent to pack removal patient preoccupied with deleterious effects on here health from retained pack and sought psychiatric treatment. |
| *Smith v Marcus*  [1989, NSW] 11 | Patient suffered persistent pain and discomfort in the pelvic area. She underwent a series of tests over a number of years including a bowel x-ray, blood tests, medical examinations, an abdominal ultrasound. Retained surgical item was discovered by her doctor’s further examination of IVP plates (not mentioned in the radiologists’ report) | Exact detail missing from record.  The plaintiff gave evidence of “her recollection of a comment made by the first defendant [surgeon] when the tube was being removed to the effect that he "thought the tube was longer than that."  Patient returned to surgeon for follow up; internal exam performed; patient informed that “nothing was wrong”. | Extension of time for filing claim allowed | Pain and discomfort in the stomach and pelvic area exacerbated by walking over a period of ten years with multiple visits to many different health professionals.  Advised to ‘eat bran’ and ‘no fat diet’ |
| Investigation into Death of James Stirling McKinlay [2013, TAS] 12 | Additional surgeries undertaken (04/06, 11/06). During the surgery at Royal Hobart Hospital on 4 June 2012 six packs were removed. A plain x-ray taken on 6 June 2012 shows the retained pack but it was not reported by the radiologist reading the film or seen by the managing doctors. A CT scan of the abdomen on 7 June again shows the retained pack which was not noted. Between then and 14 June 2012 Mr Turner became aware of the possible retention of one surgical pack in Mr McKinlay’s abdomen. During another surgical procedure on 14 June 2012 a tightly compressed pack was discovered away from the site of the other packs and was removed. | Transferred between hospitals with an incomplete medical record and a lack of clear communication of the number of packs left in situ on the handover.  “Although the LGH nursing records of retained packs were correct, the medical record was incomplete. Mr McKinley was transferred to the RHH with a relatively brief accompanying letter. I have no doubt that there was considerable discussion through numerous phone calls but examination of the medical records reveals no clear formal communication of the number of packs left in situ on the handover.”  Patient was “extremely ill and being treated in circumstances of emergency. | “it is easy to appreciate how the retained pack might have been missed both on the handover and the X-ray in this case. He was extremely ill and being treated in circumstances of emergency.”  Death occurred as a result of a fungal infection following major abdominal surgery for cancer. No other contribution to his death | Retained pack did not contribute to death.  Both hospitals were recommended to review their procedures with regards to retained packs |

#

# References

1. Australian Government Department of Health. Private Hospital Data Collection Review Final Report. Australian Government Department of Health. <https://www1.health.gov.au/internet/publications/publishing.nsf/Content/phdcreview>. Published 2011. Updated 14 June 2012. Accessed 7 July, 2021.
2. Elliott v Bickerstaff [1999] NSWCA 453.
3. Gaynor v Milton; Ulladulla Hospital (Unreported, Supreme Court of New South Wales Court of Appeal, Hope JJA, Glass JJA and Mahoney JJA, 5 November 1981).
4. Hughes v Minister for Health [1999] WASA 131.
5. Ives v Australian Capital Territory and Anor (Unreported, Supreme Court of the Australian Capital Territory, Higgins J, 20 October 1995, 8 December 1995).
6. The Australian Capital Territory v Ives. (Unreported, Federal Court of Australia, Gallop, Wilcox and Finn JJ, 16 April 1996, 26 July 1996).
7. Kenjar v ACT. Australian Capital Territory [2014] ACTSC 69.
8. Langley & Warren v Glandore Pty Ltd & Thomson [1997] QCA 342.
9. Miller v Broadbent (Unreported, Supreme Court of Queensland, Muir J, 6 August 1999, 12 August 1999).
10. O’Hagan v Sakker (2011) 12 DCLR (NSW) 329; [2011] NSWDC 60.
11. Smith v Marcus (Unreported, Supreme Court of New South Wales, Studdert J, 6 March 1989).
12. Record of investigation into death (without inquest) of James Stirling McKinlay. (Tasmanian Coroners Court 2013 TASCD 142).

1. Across Australian States and Territories, the basis on which private hospitals provide admitted patient data is either that data provision is required by legislation or data provision is provided voluntarily [↑](#footnote-ref-1)
2. No jurisdiction has a formal arrangement in place with DHA to provide DHA with updates to licence details for private hospitals and day hospitals. Informal arrangements operate for two jurisdictions. [↑](#footnote-ref-2)
